# Supplementary material for: Self-Assembly of Antiferromagnetically-Coupled Copper(II) Supramolecular Architectures with Diverse Structural Complexities
Source: MDPI journal article supplement (doi:10.3390/molecules25235549), 2020-11-26

# checkCIF/PLATON report

Structure factors have been supplied for datablock(s) n79\_08\_15\_2011a\_0m\_a, np004, np010\_0m, np011, np03, twin00\_a

THIS REPORT IS FOR GUIDANCE ONLY. IF USED AS PART OF A REVIEW PROCEDURE FOR PUBLICATION, IT SHOULD NOT REPLACE THE EXPERTISE OF AN EXPERIENCED CRYSTALLOGRAPHIC REFEREE.

No syntax errors found.      CIF dictionary      Interpreting this report

## Datablock: np004

---

Bond precision:    C-C = 0.0142 Å                      Wavelength=0.71073

Cell:                      a=27.504(8)              b=22.357(8)              c=7.817(3)  
                            alpha=90              beta=93.526(7)              gamma=90

Temperature:              190 K

|                        | Calculated                        | Reported           |
|------------------------|-----------------------------------|--------------------|
| Volume                 | 4798(3)                           | 4798(3)            |
| Space group            | C 2/c                             | C 1 2/c 1          |
| Hall group             | -C 2yc                            | -C 2yc             |
| Moiety formula         | C30 H40 Cu4 N16 O6 [+<br>solvent] | C30 H40 Cu4 N16 O6 |
| Sum formula            | C30 H40 Cu4 N16 O6 [+<br>solvent] | C30 H40 Cu4 N16 O6 |
| Mr                     | 974.98                            | 974.94             |
| Dx, g cm <sup>-3</sup> | 1.350                             | 1.350              |
| Z                      | 4                                 | 4                  |
| Mu (mm <sup>-1</sup> ) | 1.801                             | 1.801              |
| F000                   | 1984.0                            | 1984.0             |
| F000'                  | 1989.58                           |                    |
| h,k,lmax               | 32,26,9                           | 32,26,9            |
| Nref                   | 4260                              | 4253               |
| Tmin,Tmax              | 0.656,0.835                       | 0.497,0.746        |
| Tmin'                  | 0.482                             |                    |

Correction method= # Reported T Limits: Tmin=0.497 Tmax=0.746  
AbsCorr = MULTI-SCAN

Data completeness= 0.998                      Theta(max)= 25.050

R(reflections)= 0.0712( 2814)              wR2(reflections)= 0.2428( 4253)

S = 1.065                      Npar= 257

The following ALERTS were generated. Each ALERT has the format

**test-name\_ALERT\_alert-type\_alert-level.**

Click on the hyperlinks for more details of the test.

---

**Alert level B**

|                   |             |          |   |                   |       |     |              |
|-------------------|-------------|----------|---|-------------------|-------|-----|--------------|
| PLAT220_ALERT_2_B | Non-Solvent | Resd 1   | C | Ueq(max)/Ueq(min) | Range | 7.1 | Ratio        |
| PLAT420_ALERT_2_B | D-H Without | Acceptor |   | O3                | --H3  | .   | Please Check |

---

**Alert level C**

DIFMX02\_ALERT\_1\_C The maximum difference density is > 0.1\*ZMAX\*0.75

The relevant atom site should be identified.

|                   |                                                  |         |        |
|-------------------|--------------------------------------------------|---------|--------|
| PLAT094_ALERT_2_C | Ratio of Maximum / Minimum Residual Density .... | 3.49    | Report |
| PLAT097_ALERT_2_C | Large Reported Max. (Positive) Residual Density  | 2.46    | eA-3   |
| PLAT213_ALERT_2_C | Atom C11 has ADP max/min Ratio .....             | 3.5     | prolat |
| PLAT220_ALERT_2_C | Non-Solvent Resd 1 N Ueq(max)/Ueq(min) Range     | 4.2     | Ratio  |
| PLAT220_ALERT_2_C | Non-Solvent Resd 1 O Ueq(max)/Ueq(min) Range     | 4.2     | Ratio  |
| PLAT222_ALERT_3_C | Non-Solv. Resd 1 H Uiso(max)/Uiso(min) Range     | 6.9     | Ratio  |
| PLAT230_ALERT_2_C | Hirshfeld Test Diff for C9 --C10                 | 5.7     | s.u.   |
| PLAT241_ALERT_2_C | High 'MainMol' Ueq as Compared to Neighbors of   | C10     | Check  |
| PLAT242_ALERT_2_C | Low 'MainMol' Ueq as Compared to Neighbors of    | N4      | Check  |
| PLAT242_ALERT_2_C | Low 'MainMol' Ueq as Compared to Neighbors of    | C9      | Check  |
| PLAT242_ALERT_2_C | Low 'MainMol' Ueq as Compared to Neighbors of    | C14     | Check  |
| PLAT341_ALERT_3_C | Low Bond Precision on C-C Bonds .....            | 0.01423 | Ang.   |
| PLAT360_ALERT_2_C | Short C(sp3)-C(sp3) Bond C9 - C10                | 1.36    | Ang.   |
| PLAT410_ALERT_2_C | Short Intra H...H Contact H9A ..H10              | 1.97    | Ang.   |
|                   | x,y,z =                                          | 1_555   | Check  |
| PLAT905_ALERT_3_C | Negative K value in the Analysis of Variance ... | -7.114  | Report |
| PLAT911_ALERT_3_C | Missing FCF Refl Between Thmin & STh/L= 0.596    | 7       | Report |
| PLAT918_ALERT_3_C | Reflection(s) with I(obs) much Smaller I(calc) . | 3       | Check  |
| PLAT975_ALERT_2_C | Check Calcd Resid. Dens. 1.08A From O2           | 0.66    | eA-3   |
| PLAT976_ALERT_2_C | Check Calcd Resid. Dens. 0.48A From O2           | -0.46   | eA-3   |
| PLAT978_ALERT_2_C | Number C-C Bonds with Positive Residual Density. | 0       | Info   |

---

**Alert level G**

|                   |                                                  |       |        |
|-------------------|--------------------------------------------------|-------|--------|
| PLAT002_ALERT_2_G | Number of Distance or Angle Restraints on AtSite | 2     | Note   |
| PLAT003_ALERT_2_G | Number of Uiso or Uij Restrained non-H Atoms ... | 4     | Report |
| PLAT007_ALERT_5_G | Number of Unrefined Donor-H Atoms .....          | 1     | Report |
| PLAT072_ALERT_2_G | SHELXL First Parameter in WGHT Unusually Large   | 0.14  | Report |
| PLAT083_ALERT_2_G | SHELXL Second Parameter in WGHT Unusually Large  | 36.15 | Why ?  |
| PLAT172_ALERT_4_G | The CIF-Embedded .res File Contains DFIX Records | 1     | Report |
| PLAT178_ALERT_4_G | The CIF-Embedded .res File Contains SIMU Records | 1     | Report |
| PLAT343_ALERT_2_G | Unusual sp3 Angle Range in Main Residue for      | C10   | Check  |
| PLAT605_ALERT_4_G | Largest Solvent Accessible VOID in the Structure | 395   | A**3   |
| PLAT793_ALERT_4_G | Model has Chirality at C10 (Centro SPGR)         | R     | Verify |
| PLAT793_ALERT_4_G | Model has Chirality at C14 (Centro SPGR)         | S     | Verify |
| PLAT794_ALERT_5_G | Tentative Bond Valency for Cu1 (II)              | 2.25  | Info   |
| PLAT860_ALERT_3_G | Number of Least-Squares Restraints .....         | 19    | Note   |
| PLAT868_ALERT_4_G | ALERTS Due to the Use of _smtbx_masks Suppressed | !     | Info   |
| PLAT909_ALERT_3_G | Percentage of I>2sig(I) Data at Theta(Max) Still | 40%   | Note   |
| PLAT933_ALERT_2_G | Number of OMIT Records in Embedded .res File ... | 3     | Note   |

---

0 **ALERT level A** = Most likely a serious problem - resolve or explain

2 **ALERT level B** = A potentially serious problem, consider carefully

21 **ALERT level C** = Check. Ensure it is not caused by an omission or oversight

16 **ALERT level G** = General information/check it is not something unexpected

1 ALERT type 1 CIF construction/syntax error, inconsistent or missing data  
23 ALERT type 2 Indicator that the structure model may be wrong or deficient  
7 ALERT type 3 Indicator that the structure quality may be low  
6 ALERT type 4 Improvement, methodology, query or suggestion  
2 ALERT type 5 Informative message, check

---

## Datablock: np03

---

Bond precision: C-C = 0.0039 A Wavelength=0.71073

Cell: a=10.1607(6) b=24.3239(14) c=8.2923(5)  
alpha=90 beta=94.244(1) gamma=90

Temperature: 190 K

|                | Calculated        | Reported          |
|----------------|-------------------|-------------------|
| Volume         | 2043.8(2)         | 2043.8(2)         |
| Space group    | P 21/c            | P 1 21/c 1        |
| Hall group     | -P 2ybc           | -P 2ybc           |
| Moiety formula | C15 H19 Cu2 N6 O9 | C15 H19 Cu2 N6 O9 |
| Sum formula    | C15 H19 Cu2 N6 O9 | C15 H19 Cu2 N6 O9 |
| Mr             | 554.46            | 554.44            |
| Dx,g cm-3      | 1.802             | 1.802             |
| Z              | 4                 | 4                 |
| Mu (mm-1)      | 2.144             | 2.144             |
| F000           | 1124.0            | 1124.0            |
| F000'          | 1127.02           |                   |
| h,k,lmax       | 12,28,9           | 12,28,9           |
| Nref           | 3610              | 3610              |
| Tmin,Tmax      | 0.658,0.725       | 0.590,0.746       |
| Tmin'          | 0.645             |                   |

Correction method= # Reported T Limits: Tmin=0.590 Tmax=0.746  
AbsCorr = MULTI-SCAN

Data completeness= 1.000 Theta(max)= 25.045

R(reflections)= 0.0265( 3175) wR2(reflections)= 0.0722( 3610)

S = 1.025 Npar= 309

---

The following ALERTS were generated. Each ALERT has the format  
**test-name\_ALERT\_alert-type\_alert-level.**  
Click on the hyperlinks for more details of the test.

---

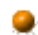

### Alert level B

PLAT430\_ALERT\_2\_B Short Inter D...A Contact O2A . .05 . 2.78 Ang.  
1+x,y,z = 1\_655 Check

---

### ● Alert level C

|                   |                                                  |       |        |
|-------------------|--------------------------------------------------|-------|--------|
| PLAT094_ALERT_2_C | Ratio of Maximum / Minimum Residual Density .... | 2.14  | Report |
| PLAT220_ALERT_2_C | Non-Solvent Resd 1 N Ueq(max)/Ueq(min) Range     | 3.3   | Ratio  |
| PLAT230_ALERT_2_C | Hirshfeld Test Diff for N3 --N4 .                | 6.9   | s.u.   |
| PLAT309_ALERT_2_C | Single Bonded Oxygen (C-O > 1.3 Ang) .....       | 02A   | Check  |
| PLAT309_ALERT_2_C | Single Bonded Oxygen (C-O > 1.3 Ang) .....       | 02B   | Check  |
| PLAT430_ALERT_2_C | Short Inter D...A Contact O2A ..O2B .            | 2.87  | Ang.   |
|                   | 1-x,-y,2-z =                                     | 3_657 | Check  |
| PLAT975_ALERT_2_C | Check Calcd Resid. Dens. 1.03A From C11          | 0.64  | eA-3   |

---

### ● Alert level G

|                   |                                                  |      |        |
|-------------------|--------------------------------------------------|------|--------|
| PLAT007_ALERT_5_G | Number of Unrefined Donor-H Atoms .....          | 2    | Report |
| PLAT300_ALERT_4_G | Atom Site Occupancy of O2A Constrained at        | 0.5  | Check  |
| PLAT300_ALERT_4_G | Atom Site Occupancy of O2B Constrained at        | 0.5  | Check  |
| PLAT301_ALERT_3_G | Main Residue Disorder .....(Resd 1 )             | 3%   | Note   |
| PLAT367_ALERT_2_G | Long? C(sp?)-C(sp?) Bond C9 - C11 .              | 1.52 | Ang.   |
| PLAT793_ALERT_4_G | Model has Chirality at C9 (Centro SPGR)          | R    | Verify |
| PLAT793_ALERT_4_G | Model has Chirality at C13 (Centro SPGR)         | S    | Verify |
| PLAT794_ALERT_5_G | Tentative Bond Valency for Cu1 (II) .            | 2.29 | Info   |
| PLAT794_ALERT_5_G | Tentative Bond Valency for Cu2 (II) .            | 2.29 | Info   |
| PLAT909_ALERT_3_G | Percentage of I>2sig(I) Data at Theta(Max) Still | 77%  | Note   |
| PLAT910_ALERT_3_G | Missing # of FCF Reflection(s) Below Theta(Min). | 1    | Note   |
| PLAT933_ALERT_2_G | Number of OMIT Records in Embedded .res File ... | 1    | Note   |
| PLAT978_ALERT_2_G | Number C-C Bonds with Positive Residual Density. | 5    | Info   |

---

0 **ALERT level A** = Most likely a serious problem - resolve or explain  
1 **ALERT level B** = A potentially serious problem, consider carefully  
7 **ALERT level C** = Check. Ensure it is not caused by an omission or oversight  
13 **ALERT level G** = General information/check it is not something unexpected

0 ALERT type 1 CIF construction/syntax error, inconsistent or missing data  
11 ALERT type 2 Indicator that the structure model may be wrong or deficient  
3 ALERT type 3 Indicator that the structure quality may be low  
4 ALERT type 4 Improvement, methodology, query or suggestion  
3 ALERT type 5 Informative message, check

---

## Datablock: np010\_0m

---

Bond precision: C-C = 0.0085 A

Wavelength=0.71073

|              |             |                |             |
|--------------|-------------|----------------|-------------|
| Cell:        | a=12.730(4) | b=8.228(3)     | c=20.879(6) |
|              | alpha=90    | beta=97.208(5) | gamma=90    |
| Temperature: | 190 K       |                |             |

|                | Calculated                       | Reported                            |
|----------------|----------------------------------|-------------------------------------|
| Volume         | 2169.6(12)                       | 2169.7(12)                          |
| Space group    | P 21/c                           | P 1 21/c 1                          |
| Hall group     | -P 2ybc                          | -P 2ybc                             |
| Moiety formula | C15 H22 Cu2 N5 O6, B F4,<br>H2 O | C15 H20 Cu2 N5 O5, B F4,<br>2(H2 O) |
| Sum formula    | C15 H24 B Cu2 F4 N5 O7           | C15 H24 B Cu2 F4 N5 O7              |
| Mr             | 600.30                           | 600.28                              |
| Dx,g cm-3      | 1.838                            | 1.838                               |
| Z              | 4                                | 4                                   |
| Mu (mm-1)      | 2.044                            | 2.044                               |
| F000           | 1216.0                           | 1216.0                              |
| F000'          | 1219.20                          |                                     |
| h,k,lmax       | 15,9,24                          | 15,9,24                             |
| Nref           | 3837                             | 3838                                |
| Tmin,Tmax      | 0.699,0.736                      | 0.439,0.746                         |
| Tmin'          | 0.395                            |                                     |

Correction method= # Reported T Limits: Tmin=0.439 Tmax=0.746  
AbsCorr = MULTI-SCAN

Data completeness= 1.000                      Theta(max)= 25.049

R(reflections)= 0.0630( 3011)              wR2(reflections)= 0.1896( 3838)

S = 1.051                      Npar= 329

The following ALERTS were generated. Each ALERT has the format  
**test-name\_ALERT\_alert-type\_alert-level.**  
Click on the hyperlinks for more details of the test.

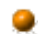

#### Alert level B

|                                            |       |              |       |              |
|--------------------------------------------|-------|--------------|-------|--------------|
| PLAT417_ALERT_2_B Short Inter D-H..H-D     | H6A   | ..H7E        | .     | 1.96 Ang.    |
|                                            |       | x,y,z =      | 1_555 | Check        |
| PLAT417_ALERT_2_B Short Inter D-H..H-D     | H6B   | ..H7D        | .     | 2.09 Ang.    |
|                                            |       | 1-x,1-y,-z = | 3_665 | Check        |
| PLAT420_ALERT_2_B D-H Without Acceptor     | O7    | --H7D        | .     | Please Check |
| PLAT971_ALERT_2_B Check Calcd Resid. Dens. | 1.07A | From C10     |       | 2.58 eA-3    |

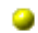

#### Alert level C

DIFMX02\_ALERT\_1\_C The maximum difference density is > 0.1\*ZMAX\*0.75  
The relevant atom site should be identified.

|                                                                    |       |        |
|--------------------------------------------------------------------|-------|--------|
| PLAT094_ALERT_2_C Ratio of Maximum / Minimum Residual Density .... | 2.68  | Report |
| PLAT097_ALERT_2_C Large Reported Max. (Positive) Residual Density  | 2.73  | eA-3   |
| PLAT222_ALERT_3_C Non-Solv. Resd 1 H Uiso(max)/Uiso(min) Range     | 6.3   | Ratio  |
| PLAT223_ALERT_4_C Solv./Anion Resd 3 H Ueq(max)/Ueq(min) Range     | 8.2   | Ratio  |
| PLAT230_ALERT_2_C Hirshfeld Test Diff for O2 --C10                 | 7.0   | s.u.   |
| PLAT232_ALERT_2_C Hirshfeld Test Diff (M-X) Cu1 --O6               | 8.3   | s.u.   |
| PLAT245_ALERT_2_C U(iso) H7D Smaller than U(eq) O7 by              | 0.034 | Ang**2 |
| PLAT250_ALERT_2_C Large U3/U1 Ratio for Average U(i,j) Tensor .... | 2.5   | Note   |
| PLAT260_ALERT_2_C Large Average Ueq of Residue Including F1        | 0.116 | Check  |

|                   |                                                  |               |
|-------------------|--------------------------------------------------|---------------|
| PLAT341_ALERT_3_C | Low Bond Precision on C-C Bonds .....            | 0.00846 Ang.  |
| PLAT415_ALERT_2_C | Short Inter D-H..H-X H2 ..H8 .                   | 2.13 Ang.     |
|                   | -x,1/2+y,1/2-z =                                 | 2_555 Check   |
| PLAT417_ALERT_2_C | Short Inter D-H..H-D H6A ..H7D .                 | 2.13 Ang.     |
|                   | x,y,z =                                          | 1_555 Check   |
| PLAT905_ALERT_3_C | Negative K value in the Analysis of Variance ... | -1.057 Report |
| PLAT975_ALERT_2_C | Check Calcd Resid. Dens. 0.92A From O6           | 0.40 eA-3     |
| PLAT976_ALERT_2_C | Check Calcd Resid. Dens. 0.74A From O2           | -0.49 eA-3    |
| PLAT976_ALERT_2_C | Check Calcd Resid. Dens. 0.72A From O2           | -0.49 eA-3    |
| PLAT977_ALERT_2_C | Check Negative Difference Density on H2          | -0.43 eA-3    |
| PLAT977_ALERT_2_C | Check Negative Difference Density on H3          | -0.54 eA-3    |
| PLAT978_ALERT_2_C | Number C-C Bonds with Positive Residual Density. | 0 Info        |

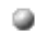

### Alert level G

|                   |                                                  |              |
|-------------------|--------------------------------------------------|--------------|
| PLAT002_ALERT_2_G | Number of Distance or Angle Restraints on AtSite | 10 Note      |
| PLAT004_ALERT_5_G | Polymeric Structure Found with Maximum Dimension | 1 Info       |
| PLAT007_ALERT_5_G | Number of Unrefined Donor-H Atoms .....          | 2 Report     |
| PLAT042_ALERT_1_G | Calc. and Reported MoietyFormula Strings Differ  | Please Check |
| PLAT083_ALERT_2_G | SHELXL Second Parameter in WGHT Unusually Large  | 10.41 Why ?  |
| PLAT172_ALERT_4_G | The CIF-Embedded .res File Contains DFIX Records | 5 Report     |
| PLAT173_ALERT_4_G | The CIF-Embedded .res File Contains DANG Records | 2 Report     |
| PLAT244_ALERT_4_G | Low 'Solvent' Ueq as Compared to Neighbors of    | B1 Check     |
| PLAT794_ALERT_5_G | Tentative Bond Valency for Cu1 (II) .            | 2.26 Info    |
| PLAT860_ALERT_3_G | Number of Least-Squares Restraints .....         | 12 Note      |
| PLAT909_ALERT_3_G | Percentage of I>2sig(I) Data at Theta(Max) Still | 64% Note     |
| PLAT910_ALERT_3_G | Missing # of FCF Reflection(s) Below Theta(Min). | 1 Note       |
| PLAT992_ALERT_5_G | Repd & Actual _reflns_number_gt Values Differ by | 1 Check      |

- 0 **ALERT level A** = Most likely a serious problem - resolve or explain  
 4 **ALERT level B** = A potentially serious problem, consider carefully  
 20 **ALERT level C** = Check. Ensure it is not caused by an omission or oversight  
 13 **ALERT level G** = General information/check it is not something unexpected
- 2 ALERT type 1 CIF construction/syntax error, inconsistent or missing data  
 21 ALERT type 2 Indicator that the structure model may be wrong or deficient  
 6 ALERT type 3 Indicator that the structure quality may be low  
 4 ALERT type 4 Improvement, methodology, query or suggestion  
 4 ALERT type 5 Informative message, check

## Datablock: n79\_08\_15\_2011a\_0m\_a

Bond precision: C-C = 0.0158 A Wavelength=0.71073

Cell: a=20.291(3) b=22.194(3) c=22.076(3)  
 alpha=90 beta=116.575(2) gamma=90

Temperature: 190 K

|                | Calculated                              | Reported                 |
|----------------|-----------------------------------------|--------------------------|
| Volume         | 8891(2)                                 | 8892(2)                  |
| Space group    | P 21/c                                  | P 1 21/c 1               |
| Hall group     | -P 2ybc                                 | -P 2ybc                  |
| Moiety formula | C72 H71 Cu7 N4 O24, N O3<br>[+ solvent] | C72 H71 Cu7 N4 O24, N O3 |
| Sum formula    | C72 H71 Cu7 N5 O27 [+<br>solvent]       | C72 H71 Cu7 N5 O27       |
| Mr             | 1883.19                                 | 1883.11                  |
| Dx,g cm-3      | 1.407                                   | 1.407                    |
| Z              | 4                                       | 4                        |
| Mu (mm-1)      | 1.714                                   | 1.714                    |
| F000           | 3828.0                                  | 3828.0                   |
| F000'          | 3838.54                                 |                          |
| h,k,lmax       | 24,26,26                                | 24,26,26                 |
| Nref           | 15749                                   | 15737                    |
| Tmin,Tmax      | 0.717,0.842                             | 0.629,0.745              |
| Tmin'          | 0.703                                   |                          |

Correction method= # Reported T Limits: Tmin=0.629 Tmax=0.745  
AbsCorr = MULTI-SCAN

Data completeness= 0.999                      Theta(max)= 25.050

R(reflections)= 0.0670( 9426)              wR2(reflections)= 0.2264( 15737)

S = 1.039                                      Npar= 1021

The following ALERTS were generated. Each ALERT has the format

**test-name\_ALERT\_alert-type\_alert-level.**

Click on the hyperlinks for more details of the test.

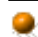

#### Alert level B

|                                                                  |                             |              |
|------------------------------------------------------------------|-----------------------------|--------------|
| PLAT213_ALERT_2_B Atom C14                                       | has ADP max/min Ratio ..... | 4.8 prolat   |
| PLAT230_ALERT_2_B Hirshfeld Test Diff for O1                     | --C15                       | 11.5 s.u.    |
| PLAT241_ALERT_2_B High 'MainMol' Ueq as Compared to Neighbors of |                             | C14 Check    |
| PLAT241_ALERT_2_B High 'MainMol' Ueq as Compared to Neighbors of |                             | C15 Check    |
| PLAT242_ALERT_2_B Low 'MainMol' Ueq as Compared to Neighbors of  |                             | C13 Check    |
| PLAT341_ALERT_3_B Low Bond Precision on C-C Bonds .....          |                             | 0.01582 Ang. |
| PLAT420_ALERT_2_B D-H Without Acceptor O2                        | --H2                        | Please Check |
| PLAT420_ALERT_2_B D-H Without Acceptor O5                        | --H5                        | Please Check |
| PLAT420_ALERT_2_B D-H Without Acceptor O6                        | --H6                        | Please Check |
| PLAT420_ALERT_2_B D-H Without Acceptor O7                        | --H7                        | Please Check |
| PLAT420_ALERT_2_B D-H Without Acceptor O10                       | --H10                       | Please Check |
| PLAT420_ALERT_2_B D-H Without Acceptor O22                       | --H22                       | Please Check |
| PLAT430_ALERT_2_B Short Inter D...A Contact O27                  | ..O27                       | 2.70 Ang.    |
|                                                                  | 1-x,2-y,-z =                | 3_675 Check  |

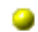

#### Alert level C

|                                        |                         |           |
|----------------------------------------|-------------------------|-----------|
| PLAT220_ALERT_2_C Non-Solvent Resd 1 C | Ueq(max)/Ueq(min) Range | 5.7 Ratio |
| PLAT220_ALERT_2_C Non-Solvent Resd 1 O | Ueq(max)/Ueq(min) Range | 4.4 Ratio |

|                   |                                                    |         |        |
|-------------------|----------------------------------------------------|---------|--------|
| PLAT222_ALERT_3_C | Non-Solv. Resd 1 H Uiso(max)/Uiso(min) Range       | 5.5     | Ratio  |
| PLAT230_ALERT_2_C | Hirshfeld Test Diff for O2 --C14 .                 | 7.0     | s.u.   |
| PLAT234_ALERT_4_C | Large Hirshfeld Difference C21 --C22 .             | 0.19    | Ang.   |
| PLAT241_ALERT_2_C | High 'MainMol' Ueq as Compared to Neighbors of O20 |         | Check  |
| PLAT241_ALERT_2_C | High 'MainMol' Ueq as Compared to Neighbors of C36 |         | Check  |
| PLAT241_ALERT_2_C | High 'MainMol' Ueq as Compared to Neighbors of C47 |         | Check  |
| PLAT241_ALERT_2_C | High 'MainMol' Ueq as Compared to Neighbors of C63 |         | Check  |
| PLAT242_ALERT_2_C | Low 'MainMol' Ueq as Compared to Neighbors of C31  |         | Check  |
| PLAT244_ALERT_4_C | Low 'Solvent' Ueq as Compared to Neighbors of N5   |         | Check  |
| PLAT260_ALERT_2_C | Large Average Ueq of Residue Including O25         | 0.182   | Check  |
| PLAT360_ALERT_2_C | Short C(sp3)-C(sp3) Bond C13 - C14 .               | 1.38    | Ang.   |
| PLAT430_ALERT_2_C | Short Inter D...A Contact O26 ..O27 .              | 2.86    | Ang.   |
|                   | 1-x,2-y,-z = 3_675                                 |         | Check  |
| PLAT905_ALERT_3_C | Negative K value in the Analysis of Variance ...   | -13.966 | Report |
| PLAT905_ALERT_3_C | Negative K value in the Analysis of Variance ...   | -0.644  | Report |
| PLAT910_ALERT_3_C | Missing # of FCF Reflection(s) Below Theta(Min).   | 6       | Note   |
| PLAT911_ALERT_3_C | Missing FCF Refl Between Thmin & STh/L= 0.596      | 7       | Report |
| PLAT918_ALERT_3_C | Reflection(s) with I(obs) much Smaller I(calc) .   | 1       | Check  |
| PLAT934_ALERT_3_C | Number of (Iobs-Icalc)/Sigma(W) > 10 Outliers ..   | 1       | Check  |
| PLAT976_ALERT_2_C | Check Calcd Resid. Dens. 1.02A From O27            | -0.63   | eA-3   |
| PLAT976_ALERT_2_C | Check Calcd Resid. Dens. 0.89A From O25            | -0.45   | eA-3   |
| PLAT976_ALERT_2_C | Check Calcd Resid. Dens. 0.70A From O2             | -0.45   | eA-3   |
| PLAT976_ALERT_2_C | Check Calcd Resid. Dens. 0.83A From O26            | -0.43   | eA-3   |
| PLAT978_ALERT_2_C | Number C-C Bonds with Positive Residual Density.   | 0       | Info   |

### ● Alert level G

|                   |                                                    |       |        |
|-------------------|----------------------------------------------------|-------|--------|
| PLAT002_ALERT_2_G | Number of Distance or Angle Restraints on AtSite   | 15    | Note   |
| PLAT003_ALERT_2_G | Number of Uiso or Uij Restrained non-H Atoms ...   | 7     | Report |
| PLAT007_ALERT_5_G | Number of Unrefined Donor-H Atoms .....            | 2     | Report |
| PLAT072_ALERT_2_G | SHELXL First Parameter in WGHT Unusually Large     | 0.12  | Report |
| PLAT083_ALERT_2_G | SHELXL Second Parameter in WGHT Unusually Large    | 28.59 | Why ?  |
| PLAT172_ALERT_4_G | The CIF-Embedded .res File Contains DFIX Records   | 5     | Report |
| PLAT173_ALERT_4_G | The CIF-Embedded .res File Contains DANG Records   | 6     | Report |
| PLAT177_ALERT_4_G | The CIF-Embedded .res File Contains DELU Records   | 3     | Report |
| PLAT186_ALERT_4_G | The CIF-Embedded .res File Contains ISOR Records   | 1     | Report |
| PLAT432_ALERT_2_G | Short Inter X...Y Contact O27 ..N5                 | 2.15  | Ang.   |
|                   | 1-x,2-y,-z = 3_675                                 |       | Check  |
| PLAT432_ALERT_2_G | Short Inter X...Y Contact N5 ..N5                  | 2.38  | Ang.   |
|                   | 1-x,2-y,-z = 3_675                                 |       | Check  |
| PLAT606_ALERT_4_G | VERY LARGE Solvent Accessible VOID(S) in Structure | !     | Info   |
| PLAT793_ALERT_4_G | Model has Chirality at C9 (Centro SPGR)            | S     | Verify |
| PLAT793_ALERT_4_G | Model has Chirality at C13 (Centro SPGR)           | S     | Verify |
| PLAT793_ALERT_4_G | Model has Chirality at C60 (Centro SPGR)           | S     | Verify |
| PLAT793_ALERT_4_G | Model has Chirality at C64 (Centro SPGR)           | S     | Verify |
| PLAT794_ALERT_5_G | Tentative Bond Valency for Cu1 (II) .              | 2.31  | Info   |
| PLAT794_ALERT_5_G | Tentative Bond Valency for Cu2 (II) .              | 2.29  | Info   |
| PLAT794_ALERT_5_G | Tentative Bond Valency for Cu3 (II) .              | 2.16  | Info   |
| PLAT794_ALERT_5_G | Tentative Bond Valency for Cu4 (II) .              | 2.16  | Info   |
| PLAT794_ALERT_5_G | Tentative Bond Valency for Cu5 (III) .             | 2.66  | Info   |
| PLAT794_ALERT_5_G | Tentative Bond Valency for Cu6 (II) .              | 2.33  | Info   |
| PLAT794_ALERT_5_G | Tentative Bond Valency for Cu7 (II) .              | 2.20  | Info   |
| PLAT860_ALERT_3_G | Number of Least-Squares Restraints .....           | 32    | Note   |
| PLAT868_ALERT_4_G | ALERTS Due to the Use of _smtbx_masks Suppressed   | !     | Info   |
| PLAT909_ALERT_3_G | Percentage of I>2sig(I) Data at Theta(Max) Still   | 31%   | Note   |
| PLAT913_ALERT_3_G | Missing # of Very Strong Reflections in FCF ....   | 1     | Note   |
| PLAT933_ALERT_2_G | Number of OMIT Records in Embedded .res File ...   | 8     | Note   |

---

0 **ALERT level A** = Most likely a serious problem - resolve or explain  
13 **ALERT level B** = A potentially serious problem, consider carefully  
25 **ALERT level C** = Check. Ensure it is not caused by an omission or oversight



28 **ALERT level G** = General information/check it is not something unexpected

0 ALERT type 1 CIF construction/syntax error, inconsistent or missing data  
35 ALERT type 2 Indicator that the structure model may be wrong or deficient  
11 ALERT type 3 Indicator that the structure quality may be low  
12 ALERT type 4 Improvement, methodology, query or suggestion  
8 ALERT type 5 Informative message, check

---

## Datablock: twin00\_a

---

Bond precision: C-C = 0.0265 A

Wavelength=0.71073

Cell: a=12.835(13) b=15.38(2) c=15.81(2)  
alpha=103.149(17) beta=113.233(9) gamma=100.144(14)

Temperature: 190 K

|                | Calculated                          | Reported             |
|----------------|-------------------------------------|----------------------|
| Volume         | 2667(6)                             | 2666(6)              |
| Space group    | P -1                                | P -1                 |
| Hall group     | -P 1                                | -P 1                 |
| Moiety formula | C88 H100 Cu10 N8 O32 [+<br>solvent] | C88 H100 Cu10 N8 O32 |
| Sum formula    | C88 H100 Cu10 N8 O32 [+<br>solvent] | C88 H100 Cu10 N8 O32 |
| Mr             | 2417.27                             | 2417.15              |
| Dx,g cm-3      | 1.505                               | 1.506                |
| Z              | 1                                   | 1                    |
| Mu (mm-1)      | 2.027                               | 2.028                |
| F000           | 1230.0                              | 1230.0               |
| F000'          | 1233.67                             |                      |
| h,k,lmax       | 15,18,18                            | 0,0,0                |
| Nref           | 9442                                | 9178                 |
| Tmin,Tmax      | 0.673,0.816                         | 0.008,0.027          |
| Tmin'          | 0.660                               |                      |

Correction method= # Reported T Limits: Tmin=0.008 Tmax=0.027

AbsCorr = MULTI-SCAN

Data completeness= 0.972

Theta(max)= 25.050

R(reflections)= 0.0996( 3395)

wR2(reflections)= 0.2739( 9178)

S = 0.886

Npar= 622

---

**test-name\_ALERT\_alert-type\_alert-level.**  
Click on the hyperlinks for more details of the test.

PLAT417\_ALERT\_2\_A Short Inter D-H..H-D            H3         ..H5         .         1.43 Ang.  
                                -1+x,y,z =         1\_455 Check

```

RINTA01_ALERT_3_B The value of Rint is greater than 0.18
                   Rint given    0.181
PLAT020_ALERT_3_B The Value of Rint is Greater Than 0.12 ..... 0.181 Report
PLAT026_ALERT_3_B Ratio Observed / Unique Reflections (too) Low .. 37% Check
PLAT230_ALERT_2_B Hirshfeld Test Diff for      C13      --C15      . 7.5 s.u.
PLAT341_ALERT_3_B Low Bond Precision on  C-C Bonds ..... 0.0265 Ang.
PLAT416_ALERT_2_B Short Intra D-H..H-D      H4      ..H14      . 1.86 Ang.
                                x,y,z = 1_555 Check
PLAT417_ALERT_2_B Short Inter D-H..H-D      H13      ..H15      . 1.83 Ang.
                                -1+x,y,z = 1_455 Check

```

|                   |                                                  |     |       |   |              |
|-------------------|--------------------------------------------------|-----|-------|---|--------------|
| PLAT420_ALERT_2_B | D-H Without Acceptor                             | 04  | --H4  | . | Please Check |
| PLAT420_ALERT_2_B | D-H Without Acceptor                             | 013 | --H13 | . | Please Check |
| PLAT420_ALERT_2_B | D-H Without Acceptor                             | 014 | --H14 | . | Please Check |
| PLAT919_ALERT_3_B | Reflection # Likely Affected by the Beamstop ... |     |       |   | 3 Check      |
| PLAT934_ALERT_3_B | Number of (Iobs-Icalc)/Sigma(W) > 10 Outliers .. |     |       |   | 4 Check      |

|                   |                                     |           |                                 |                           |             |           |
|-------------------|-------------------------------------|-----------|---------------------------------|---------------------------|-------------|-----------|
| PLAT029_ALERT_3_C | _diffn_measured_fraction_theta_full | value Low | .                               | 0.972                     | Why?        |           |
| PLAT084_ALERT_3_C | High wr2 Value (i.e. > 0.25)        | .....     | .                               | 0.27                      | Report      |           |
| PLAT148_ALERT_3_C | s.u. on the                         | a         | - Axis is (Too) Large           | ....                      | 0.013 Ang.  |           |
| PLAT148_ALERT_3_C | s.u. on the                         | b         | - Axis is (Too) Large           | ....                      | 0.020 Ang.  |           |
| PLAT148_ALERT_3_C | s.u. on the                         | c         | - Axis is (Too) Large           | ....                      | 0.020 Ang.  |           |
| PLAT213_ALERT_2_C | Atom C11                            |           | has ADP max/min Ratio           | ....                      | 3.7 prolat  |           |
| PLAT213_ALERT_2_C | Atom C39                            |           | has ADP max/min Ratio           | ....                      | 3.9 prolat  |           |
| PLAT220_ALERT_2_C | Non-Solvent                         | Resd 1    | C                               | Ueq(max)/Ueq(min) Range   | 5.0 Ratio   |           |
| PLAT220_ALERT_2_C | Non-Solvent                         | Resd 1    | O                               | Ueq(max)/Ueq(min) Range   | 4.2 Ratio   |           |
| PLAT222_ALERT_3_C | Non-Solv.                           | Resd 1    | H                               | Uiso(max)/Uiso(min) Range | 4.8 Ratio   |           |
| PLAT230_ALERT_2_C | Hirshfeld Test Diff for             | O3        | --C11                           | .                         | 5.8 s.u.    |           |
| PLAT234_ALERT_4_C | Large Hirshfeld Difference          | O12       | --C39                           | .                         | 0.20 Ang.   |           |
| PLAT234_ALERT_4_C | Large Hirshfeld Difference          | N1        | --C9                            | .                         | 0.24 Ang.   |           |
| PLAT234_ALERT_4_C | Large Hirshfeld Difference          | C38       | --C39                           | .                         | 0.18 Ang.   |           |
| PLAT234_ALERT_4_C | Large Hirshfeld Difference          | C42       | --C43                           | .                         | 0.18 Ang.   |           |
| PLAT241_ALERT_2_C | High                                | 'MainMol' | Ueq as Compared to Neighbors of |                           | 07 Check    |           |
| PLAT241_ALERT_2_C | High                                | 'MainMol' | Ueq as Compared to Neighbors of |                           | C18 Check   |           |
| PLAT241_ALERT_2_C | High                                | 'MainMol' | Ueq as Compared to Neighbors of |                           | C20 Check   |           |
| PLAT242_ALERT_2_C | Low                                 | 'MainMol' | Ueq as Compared to Neighbors of |                           | C17 Check   |           |
| PLAT415_ALERT_2_C | Short Inter D-H..H-X                |           | H13                             | ..H38                     | .           | 2.14 Ang. |
|                   |                                     |           | -x,1-y,-z                       | =                         | 2.565 Check |           |

|                   |                                                  |        |        |
|-------------------|--------------------------------------------------|--------|--------|
| PLAT906_ALERT_3_C | Large K Value in the Analysis of Variance .....  | 10.048 | Check  |
| PLAT906_ALERT_3_C | Large K Value in the Analysis of Variance .....  | 3.466  | Check  |
| PLAT906_ALERT_3_C | Large K Value in the Analysis of Variance .....  | 2.061  | Check  |
| PLAT911_ALERT_3_C | Missing FCF Refl Between Thmin & STh/L= 0.596    | 265    | Report |
| PLAT918_ALERT_3_C | Reflection(s) with I(obs) much Smaller I(calc) . | 3      | Check  |
| PLAT977_ALERT_2_C | Check Negative Difference Density on H4          | -0.55  | eA-3   |
| PLAT977_ALERT_2_C | Check Negative Difference Density on H10A        | -0.52  | eA-3   |
| PLAT977_ALERT_2_C | Check Negative Difference Density on H10B        | -0.33  | eA-3   |
| PLAT977_ALERT_2_C | Check Negative Difference Density on H14         | -0.33  | eA-3   |
| PLAT977_ALERT_2_C | Check Negative Difference Density on H43B        | -0.31  | eA-3   |
| PLAT978_ALERT_2_C | Number C-C Bonds with Positive Residual Density. | 0      | Info   |

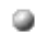

### Alert level G

|                   |                                                    |        |              |
|-------------------|----------------------------------------------------|--------|--------------|
| PLAT002_ALERT_2_G | Number of Distance or Angle Restraints on AtSite   | 10     | Note         |
| PLAT003_ALERT_2_G | Number of Uiso or Uij Restrained non-H Atoms ...   | 8      | Report       |
| PLAT007_ALERT_5_G | Number of Unrefined Donor-H Atoms .....            | 4      | Report       |
| PLAT072_ALERT_2_G | SHELXL First Parameter in WGHT Unusually Large     | 0.13   | Report       |
| PLAT172_ALERT_4_G | The CIF-Embedded .res File Contains DFIX Records   | 3      | Report       |
| PLAT173_ALERT_4_G | The CIF-Embedded .res File Contains DANG Records   | 4      | Report       |
| PLAT186_ALERT_4_G | The CIF-Embedded .res File Contains ISOR Records   | 1      | Report       |
| PLAT187_ALERT_4_G | The CIF-Embedded .res File Contains RIGU Records   | 2      | Report       |
| PLAT606_ALERT_4_G | VERY LARGE Solvent Accessible VOID(S) in Structure | !      | Info         |
| PLAT793_ALERT_4_G | Model has Chirality at C9 (Centro SPGR)            | R      | Verify       |
| PLAT793_ALERT_4_G | Model has Chirality at C13 (Centro SPGR)           | R      | Verify       |
| PLAT793_ALERT_4_G | Model has Chirality at C38 (Centro SPGR)           | R      | Verify       |
| PLAT793_ALERT_4_G | Model has Chirality at C42 (Centro SPGR)           | R      | Verify       |
| PLAT794_ALERT_5_G | Tentative Bond Valency for Cu1 (II) .              | 2.24   | Info         |
| PLAT794_ALERT_5_G | Tentative Bond Valency for Cu2 (III) .             | 2.69   | Info         |
| PLAT794_ALERT_5_G | Tentative Bond Valency for Cu4 (II) .              | 2.19   | Info         |
| PLAT794_ALERT_5_G | Tentative Bond Valency for Cu5 (II) .              | 2.27   | Info         |
| PLAT860_ALERT_3_G | Number of Least-Squares Restraints .....           | 82     | Note         |
| PLAT868_ALERT_4_G | ALERTS Due to the Use of _smtbx_masks Suppressed   | !      | Info         |
| PLAT908_ALERT_2_G | Max. Perc. Data with I > 2*s(I) per Res.Shell .    | 74.04% | Note         |
| PLAT961_ALERT_5_G | Dataset Contains no Negative Intensities .....     |        | Please Check |

- 1 **ALERT level A** = Most likely a serious problem - resolve or explain  
 12 **ALERT level B** = A potentially serious problem, consider carefully  
 31 **ALERT level C** = Check. Ensure it is not caused by an omission or oversight  
 21 **ALERT level G** = General information/check it is not something unexpected

- 0 ALERT type 1 CIF construction/syntax error, inconsistent or missing data  
 27 ALERT type 2 Indicator that the structure model may be wrong or deficient  
 18 ALERT type 3 Indicator that the structure quality may be low  
 14 ALERT type 4 Improvement, methodology, query or suggestion  
 6 ALERT type 5 Informative message, check

## Datablock: np011

Bond precision: C-C = 0.0062 A

Wavelength=0.71073

|              |               |                 |               |
|--------------|---------------|-----------------|---------------|
| Cell:        | a=17.6107(10) | b=11.8828(7)    | c=22.8905(17) |
|              | alpha=90      | beta=109.071(1) | gamma=90      |
| Temperature: | 190 K         |                 |               |

|                | Calculated                        | Reported           |
|----------------|-----------------------------------|--------------------|
| Volume         | 4527.3(5)                         | 4527.3(5)          |
| Space group    | C 2/c                             | C 1 2/c 1          |
| Hall group     | -C 2yc                            | -C 2yc             |
| Moiety formula | C30 H44 Cu4 N4 O10 [+<br>solvent] | C30 H44 Cu4 N4 O10 |
| Sum formula    | C30 H44 Cu4 N4 O10 [+<br>solvent] | C30 H44 Cu4 N4 O10 |
| Mr             | 874.89                            | 874.85             |
| Dx,g cm-3      | 1.284                             | 1.284              |
| Z              | 4                                 | 4                  |
| Mu (mm-1)      | 1.899                             | 1.899              |
| F000           | 1792.0                            | 1792.0             |
| F000'          | 1797.72                           |                    |
| h,k,lmax       | 20,14,27                          | 20,14,27           |
| Nref           | 4015                              | 4004               |
| Tmin,Tmax      | 0.640,0.684                       | 0.456,0.746        |
| Tmin'          | 0.383                             |                    |

Correction method= # Reported T Limits: Tmin=0.456 Tmax=0.746  
AbsCorr = MULTI-SCAN

Data completeness= 0.997                      Theta(max)= 25.047

R(reflections)= 0.0401( 3738)              wR2(reflections)= 0.1286( 4004)

S = 1.165                                      Npar= 221

The following ALERTS were generated. Each ALERT has the format

**test-name\_ALERT\_alert-type\_alert-level.**

Click on the hyperlinks for more details of the test.

#### Alert level B

|                                                                    |    |       |   |              |
|--------------------------------------------------------------------|----|-------|---|--------------|
| PLAT420_ALERT_2_B D-H Without Acceptor                             | O3 | --H3  | . | Please Check |
| PLAT420_ALERT_2_B D-H Without Acceptor                             | O5 | --H5A | . | Please Check |
| PLAT420_ALERT_2_B D-H Without Acceptor                             | O5 | --H5B | . | Please Check |
| PLAT919_ALERT_3_B Reflection # Likely Affected by the Beamstop ... |    |       |   | 1 Check      |
| PLAT934_ALERT_3_B Number of (Iobs-Icalc)/Sigma(W) > 10 Outliers .. |    |       |   | 3 Check      |

#### Alert level C

|                                                                    |                     |              |
|--------------------------------------------------------------------|---------------------|--------------|
| PLAT341_ALERT_3_C Low Bond Precision on C-C Bonds .....            |                     | 0.00623 Ang. |
| PLAT415_ALERT_2_C Short Inter D-H..H-X                             | H5A ..H11           | 2.12 Ang.    |
|                                                                    | 1/2-x,1/2+y,1/2-z = | 4_555 Check  |
| PLAT906_ALERT_3_C Large K Value in the Analysis of Variance .....  |                     | 2.421 Check  |
| PLAT911_ALERT_3_C Missing FCF Refl Between Thmin & STh/L=          | 0.596               | 11 Report    |
| PLAT918_ALERT_3_C Reflection(s) with I(obs) much Smaller I(calc) . |                     | 1 Check      |
| PLAT975_ALERT_2_C Check Calcd Resid. Dens.                         | 0.97A From O2       | 0.50 eA-3    |
| PLAT975_ALERT_2_C Check Calcd Resid. Dens.                         | 0.86A From O4       | 0.48 eA-3    |
| PLAT977_ALERT_2_C Check Negative Difference Density on H5A         |                     | -0.46 eA-3   |
| PLAT978_ALERT_2_C Number C-C Bonds with Positive Residual Density. |                     | 0 Info       |

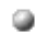

## Alert level G

|                   |                                                  |       |          |
|-------------------|--------------------------------------------------|-------|----------|
| PLAT007_ALERT_5_G | Number of Unrefined Donor-H Atoms .....          | 3     | Report   |
| PLAT083_ALERT_2_G | SHELXL Second Parameter in WGHT Unusually Large  | 28.43 | Why ?    |
| PLAT605_ALERT_4_G | Largest Solvent Accessible VOID in the Structure | 1190  | A**3     |
| PLAT793_ALERT_4_G | Model has Chirality at C11 (Centro SPGR)         |       | R Verify |
| PLAT793_ALERT_4_G | Model has Chirality at C14 (Centro SPGR)         |       | S Verify |
| PLAT794_ALERT_5_G | Tentative Bond Valency for Cu2 (II) .            | 2.22  | Info     |
| PLAT868_ALERT_4_G | ALERTS Due to the Use of _smtbx_masks Suppressed |       | ! Info   |
| PLAT909_ALERT_3_G | Percentage of I>2sig(I) Data at Theta(Max) Still | 87%   | Note     |
| PLAT910_ALERT_3_G | Missing # of FCF Reflection(s) Below Theta(Min). |       | 1 Note   |
| PLAT933_ALERT_2_G | Number of OMIT Records in Embedded .res File ... | 11    | Note     |

- 
- 0 **ALERT level A** = Most likely a serious problem - resolve or explain  
5 **ALERT level B** = A potentially serious problem, consider carefully  
9 **ALERT level C** = Check. Ensure it is not caused by an omission or oversight  
10 **ALERT level G** = General information/check it is not something unexpected

- 0 ALERT type 1 CIF construction/syntax error, inconsistent or missing data  
10 ALERT type 2 Indicator that the structure model may be wrong or deficient  
8 ALERT type 3 Indicator that the structure quality may be low  
4 ALERT type 4 Improvement, methodology, query or suggestion  
2 ALERT type 5 Informative message, check
- 

It is advisable to attempt to resolve as many as possible of the alerts in all categories. Often the minor alerts point to easily fixed oversights, errors and omissions in your CIF or refinement strategy, so attention to these fine details can be worthwhile. In order to resolve some of the more serious problems it may be necessary to carry out additional measurements or structure refinements. However, the purpose of your study may justify the reported deviations and the more serious of these should normally be commented upon in the discussion or experimental section of a paper or in the "special\_details" fields of the CIF. checkCIF was carefully designed to identify outliers and unusual parameters, but every test has its limitations and alerts that are not important in a particular case may appear. Conversely, the absence of alerts does not guarantee there are no aspects of the results needing attention. It is up to the individual to critically assess their own results and, if necessary, seek expert advice.

### Publication of your CIF in IUCr journals

A basic structural check has been run on your CIF. These basic checks will be run on all CIFs submitted for publication in IUCr journals (*Acta Crystallographica*, *Journal of Applied Crystallography*, *Journal of Synchrotron Radiation*); however, if you intend to submit to *Acta Crystallographica Section C* or *E* or *IUCrData*, you should make sure that full publication checks are run on the final version of your CIF prior to submission.

### Publication of your CIF in other journals

Please refer to the *Notes for Authors* of the relevant journal for any special instructions relating to CIF submission.

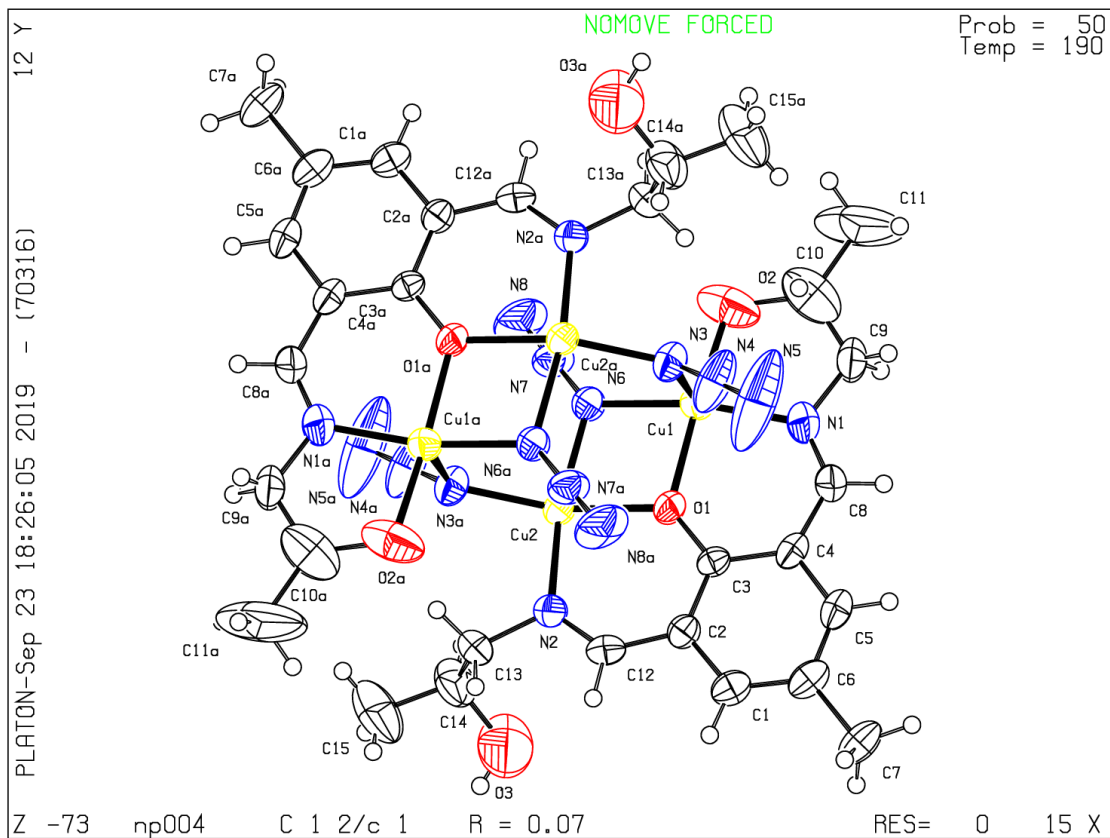

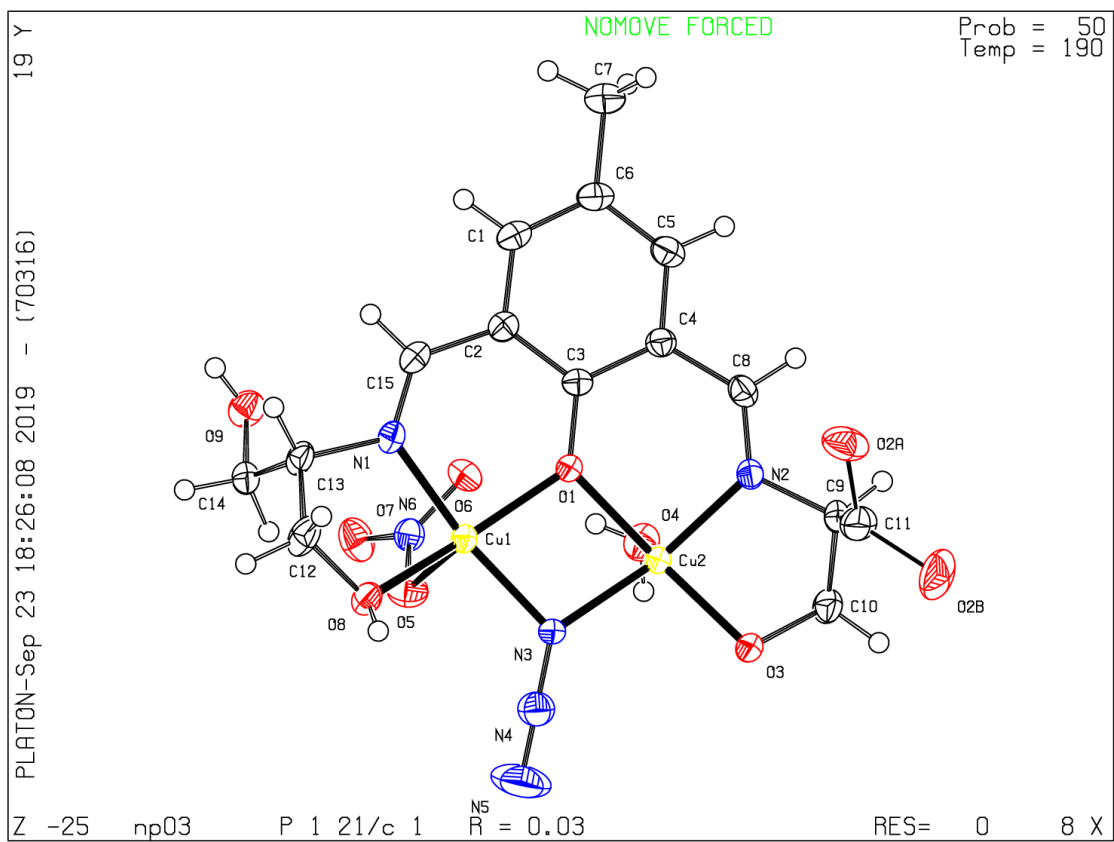

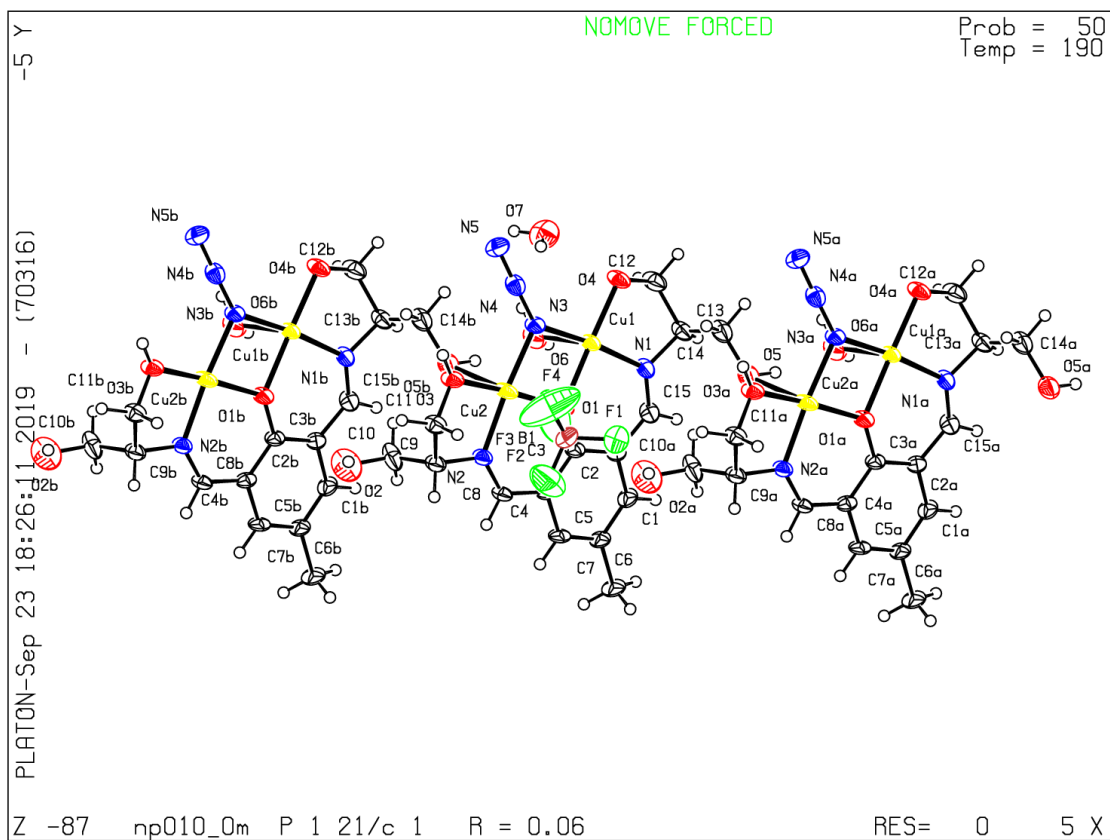



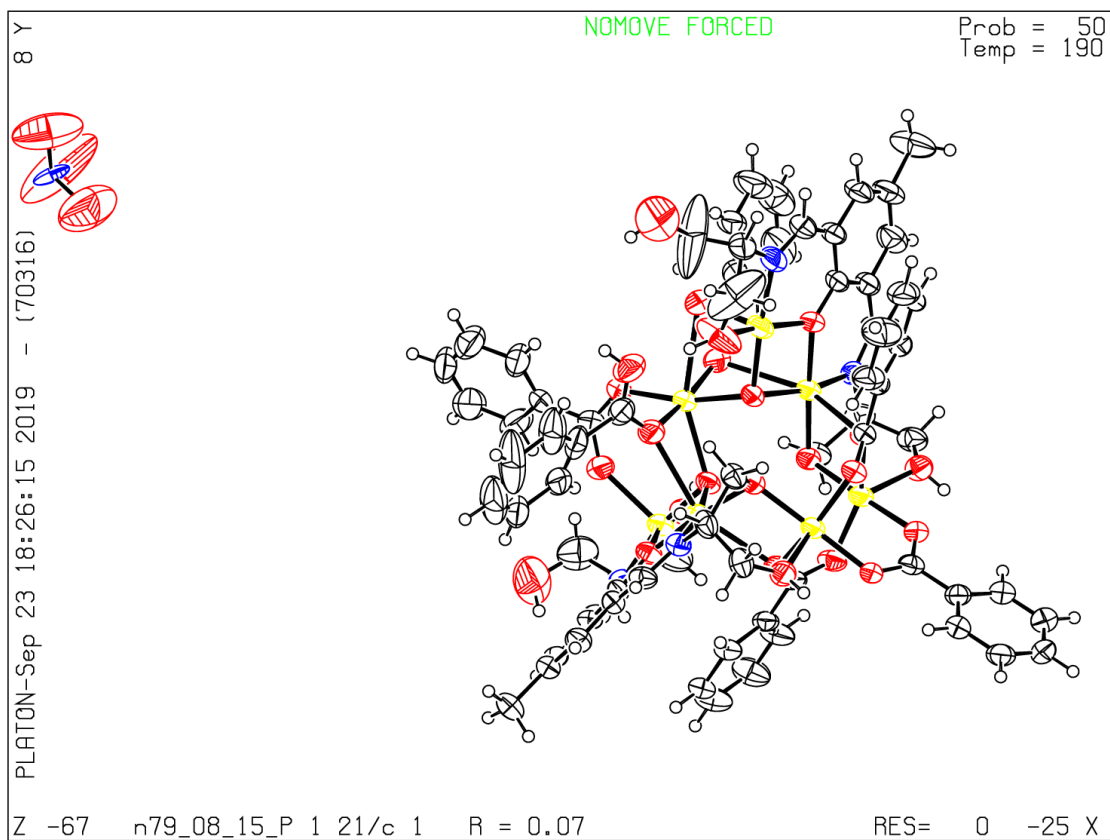

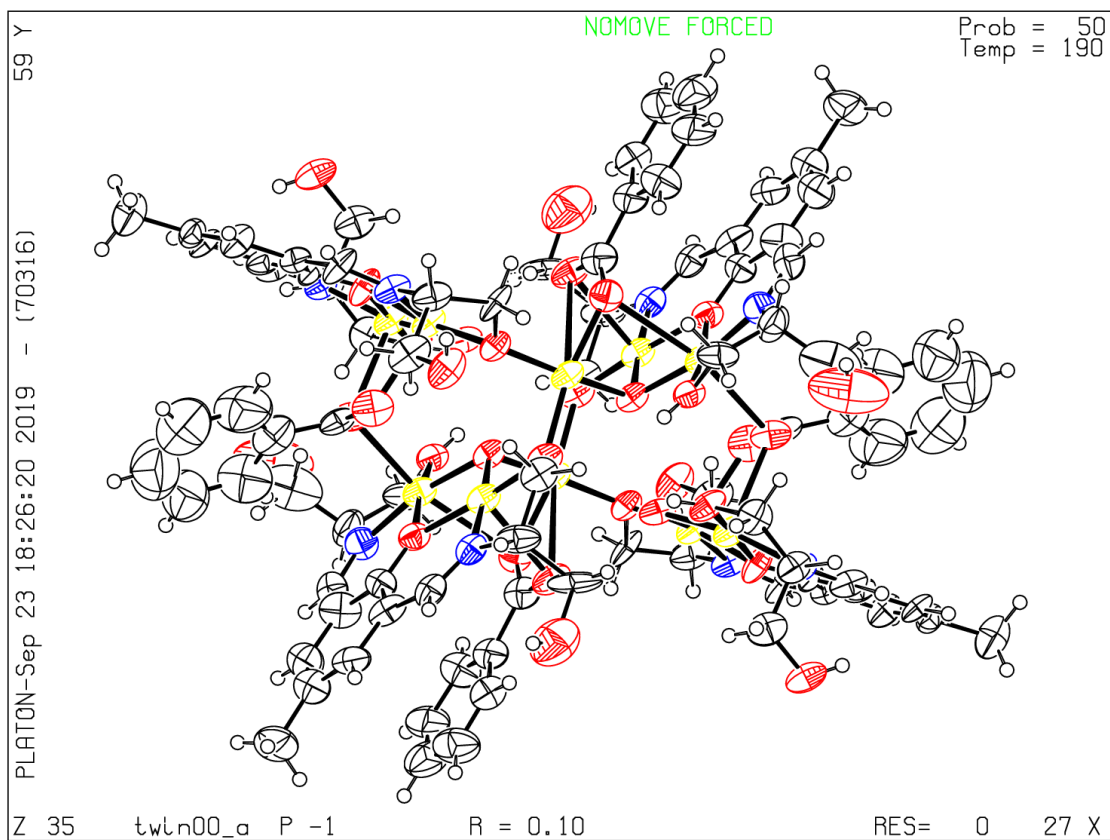

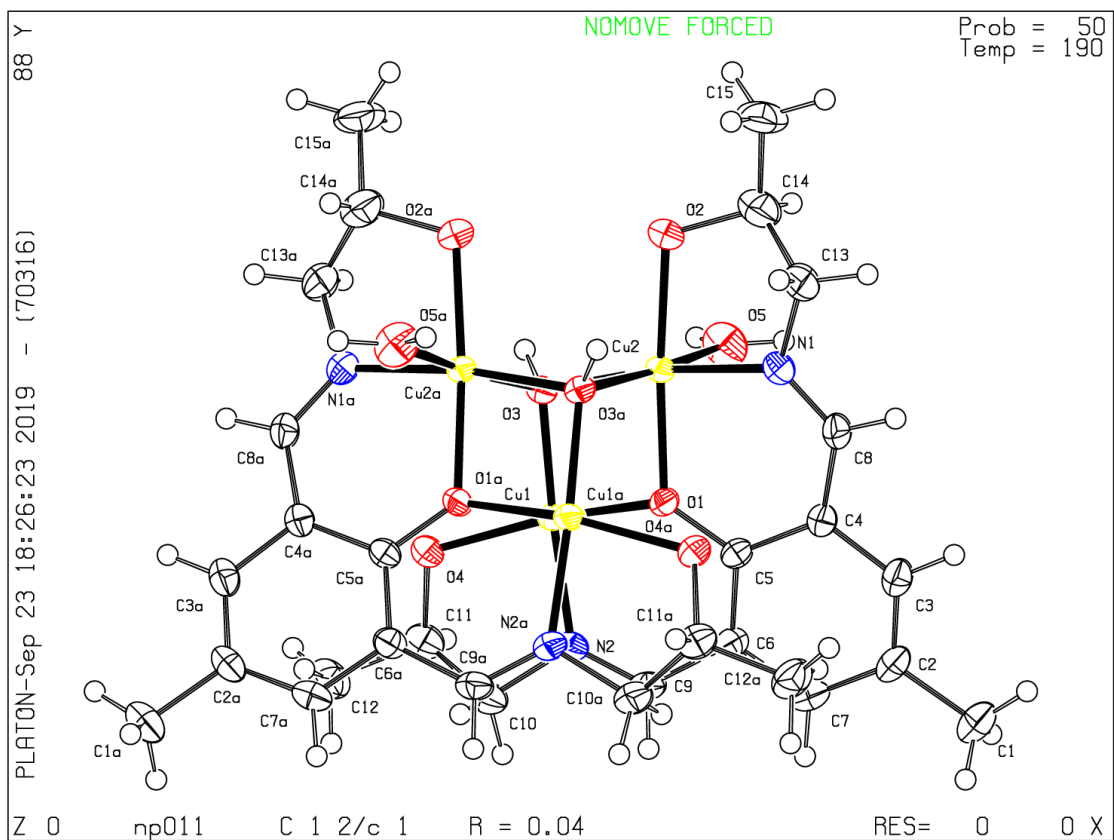

Supplement: s1 [file s1]
