# Supplementary material for: Self-Assembly of Antiferromagnetically-Coupled Copper(II) Supramolecular Architectures with Diverse Structural Complexities
Source: MDPI journal article supplement (doi:10.3390/molecules25235549), 2020-11-26

## Supplementary Information

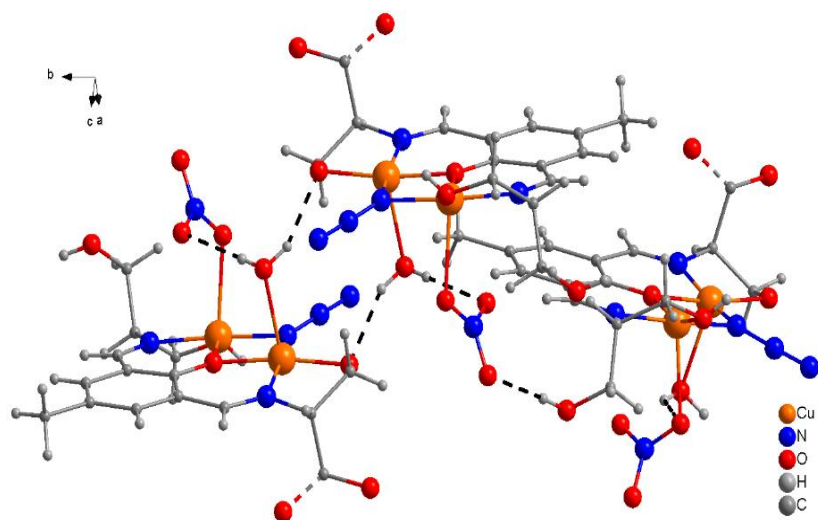

**Figure S1.** Perspective view of crystal packing of **3** along the *ab* axis, showing the formation of a 2D-sheet structure.

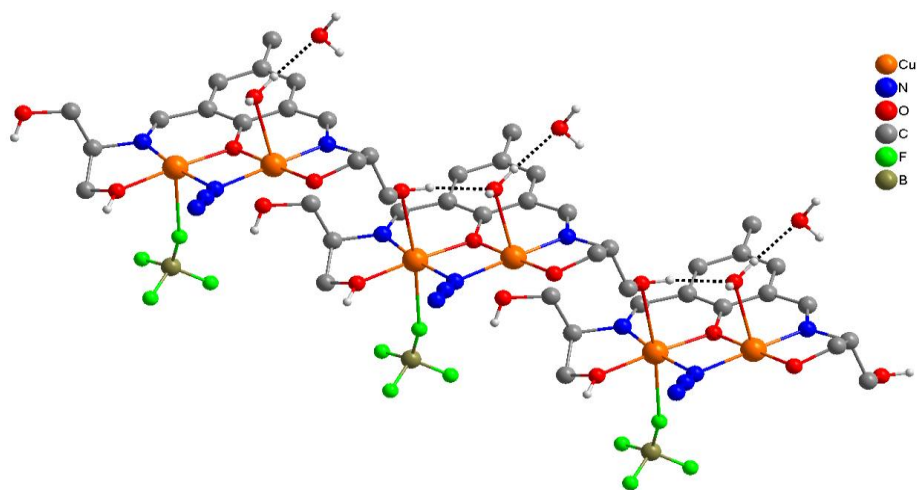

**Figure S2.** Perspective view of a portion of 1D-single chain in **4** along the *b*-axis.

**Figures S3-S5 (XRD Pattern**  
**Figures S3.**

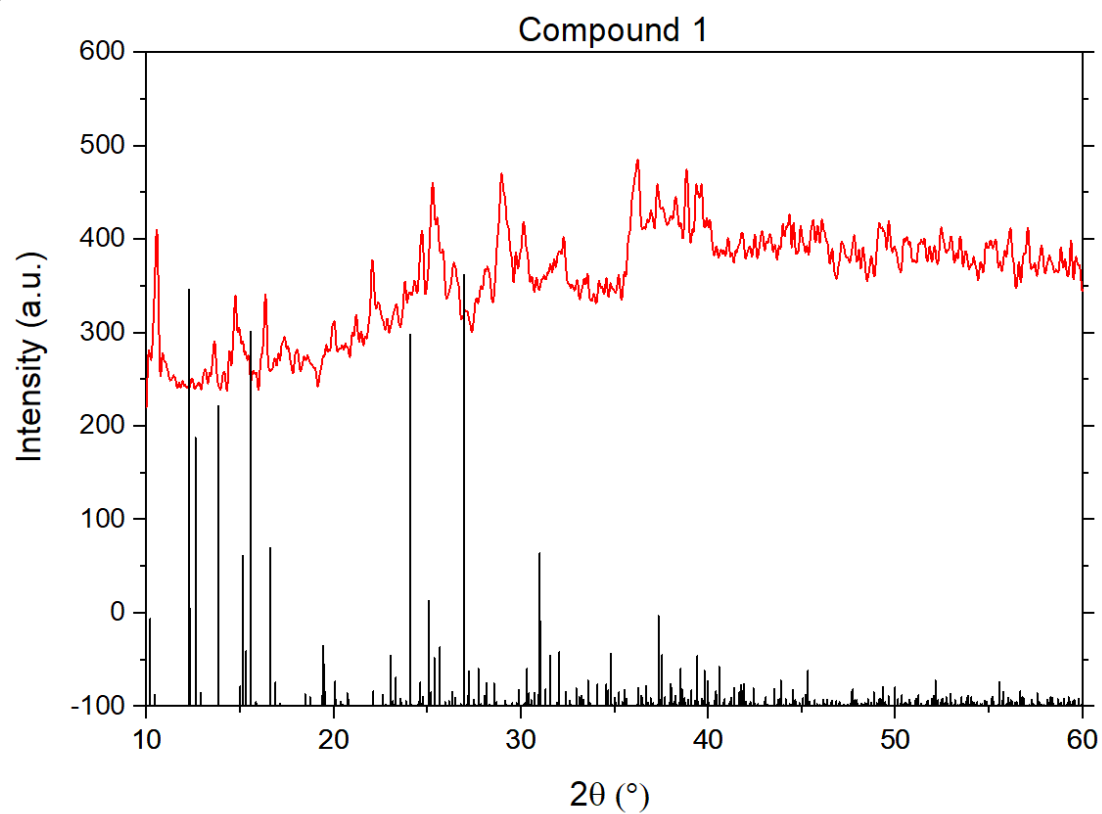

**Figure S4.**

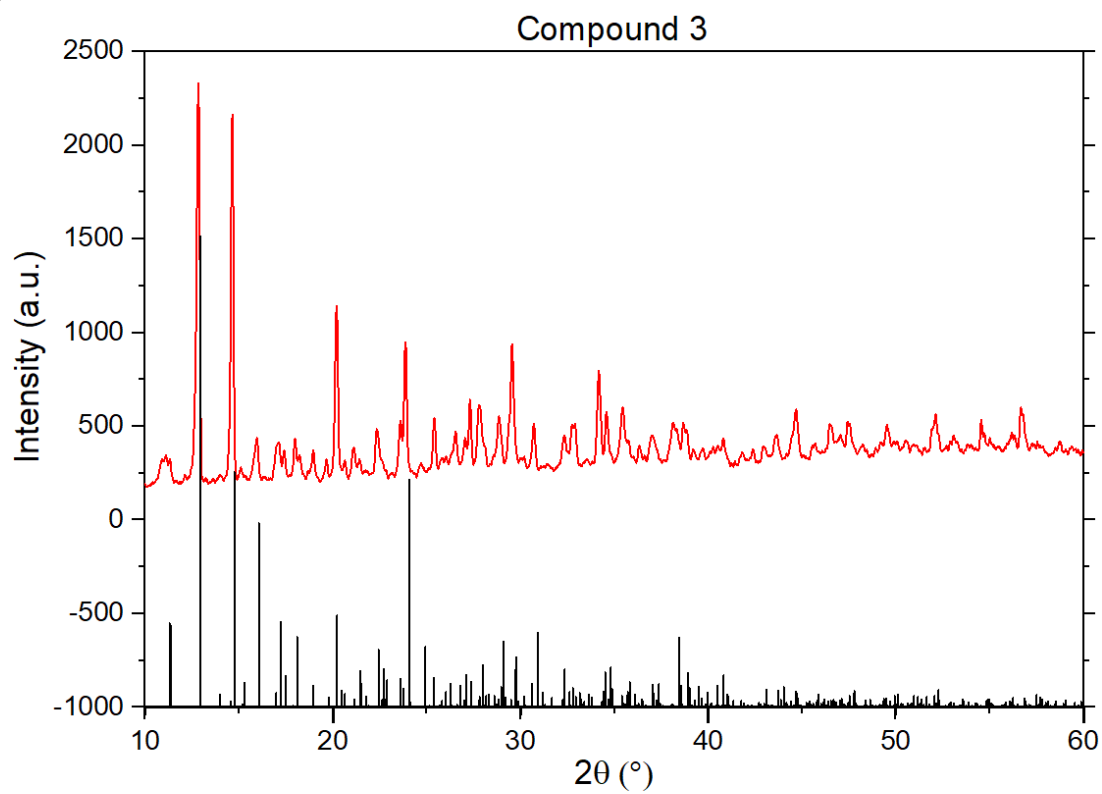

Figure S5.

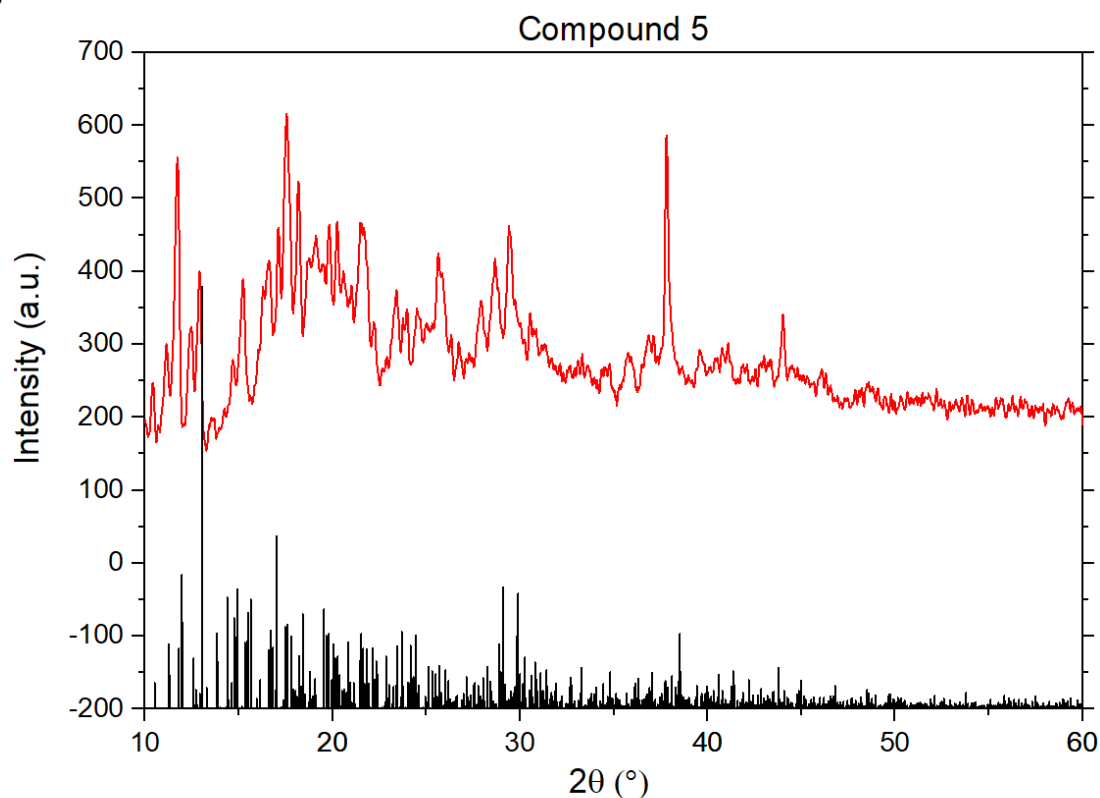

## Electronic Supplementary Information

### Tables S1-S6 for bond lengths and angles

**Table S1.** Bond lengths [ $\text{\AA}$ ] and angles [ $^\circ$ ] for **1**.

| Bond lengths | [ $\text{\AA}$ ] | Bond angles       | [ $^\circ$ ] |
|--------------|------------------|-------------------|--------------|
| Cu(1)-O(1)   | 1.984(5)         | N(1)-Cu(1)-O(1)   | 92.3(3)      |
| Cu(1)-N(1)   | 1.944(7)         | N(1)-Cu(1)-O(2)   | 85.6(4)      |
| Cu(1)-N(6)   | 1.965(6)         | O(2)-Cu(1)-N(6)   | 103.1(4)     |
| Cu(1)-O(2)   | 1.943(7)         | N6(1)-Cu(1)-O(1)  | 78.4(2)      |
| Cu(1)-N(3)   | 2.422(7)         | N(1)-Cu(1)-N(6)   | 169.4(3)     |
| Cu(2)-O(1)   | 1.998(5)         | O(1)-Cu(1)-O(2)   | 173.3(3)     |
| Cu(2)-N(2)   | 1.959(6)         | Cu(1)-O(1)-Cu(2)  | 101.88       |
| Cu(2)-N(3)   | 1.968(7)         | Cu(1)-N(6)-Cu(2)  | 102.4(3)     |
| Cu(2)-N(6)   | 2.001(7)         | N(2)-Cu(2)-O(1)   | 91.5(3)      |
| Cu(1)-Cu(2)  | 3.092            | N(2)-Cu(2)-N(3A)  | 95.1(3)      |
|              |                  | N(3A)-Cu(2)-N(6)  | 94.4(3)      |
|              |                  | N(6)-Cu(2)-O(1)   | 77.2(2)      |
|              |                  | O(1)-Cu(2)-N(3A)  | 160.6(3)     |
|              |                  | N(2)-Cu(2)-N(6)   | 167.6(3)     |
|              |                  | Cu(1)-O(1)-Cu(2)  | 101.9(2)     |
|              |                  | Cu(1)-N(3)-Cu(2A) | 108.9(3)     |

**Table S2.** Bond lengths [ $\text{\AA}$ ] and angles [ $^\circ$ ] for **2**.

| Bond lengths | [Å]      | Bond angles        | [°]        |
|--------------|----------|--------------------|------------|
| Cu(1)-O(1)   | 1.951(3) | O(1)-Cu(1)-O(4)    | 162.30(15) |
| Cu(1)-O(3)   | 1.944(3) | O(3)-Cu(1)-O(1)    | 81.52(14)  |
| Cu(1)-O(4)   | 1.993(3) | O(3)-Cu(1)-O(4)    | 102.72(14) |
| Cu(1)-N(2)   | 1.938(4) | N2(1)-Cu(1)-O(1)   | 89.89(16)  |
| Cu(2)-O(1)   | 1.979(3) | N(2)-Cu(1)-O(2)    | 168.32(17) |
| Cu(2)-O(2)   | 2.038(4) | N(2)-Cu(1)-O(4)    | 83.19(19)  |
| Cu(2)-O(3)   | 1.956(3) | Cu(1)-O(1)-Cu(2)   | 98.02(14)  |
| Cu(2)-O(3A)  | 2.360(3) | Cu(1)-O(3)-Cu(2)   | 92.05(16)  |
| Cu(2)-O(5)   | 2.393(4) | Cu(1)-O(3)-Cu((2A) | 110.07(15) |
| Cu(2)-N(1)   | 1.936(4) | Cu(2)-O(3)-Cu(2A)  | 95.07(13)  |
| Cu(1)-Cu(2)  | 2.967    | O(3)-Cu(2)-O(1)    | 80.54(13)  |
|              |          | O(3)-Cu(2)-O(2)    | 105.09(14) |
|              |          | N(1)-Cu(2)-O(1)    | 91.00(16)  |
|              |          | N(1)-Cu(2)-O(2)    | 83.35(16)  |
|              |          | O(1)-Cu(2)-O(2)    | 174.08(14) |
|              |          | N(1)-Cu(2)-O(3)    | 171.53(16) |
|              |          | O(3A)-Cu(2)-O(5)   | 173.61(13) |

**Table S3.** Bond distances [Å] and angles [°] for **3**.

| Bond lengths | Å          | Bond angles      | [°]       |
|--------------|------------|------------------|-----------|
| Cu(1)-O(1)   | 1.9506(17) | N(1)-Cu(1)-O(1)  | 92.15(8)  |
| Cu(1)-N(1)   | 1.915(2)   | N(1)-Cu(1)-O(8)  | 84.67(9)  |
| Cu(1)-N(3)   | 1.959(2)   | O(8)-Cu(1)-N(3)  | 102.28(8) |
| Cu(1)-O(8)   | 1.9786(19) | N(3)-Cu(1)-O(1)  | 79.98(8)  |
| Cu(1)-O(5)   | 2.384(2)   | N(1)-Cu(1)-N(3)  | 172.06(8) |
| Cu(2)-O(1)   | 1.9680(17) | O(1)-Cu(1)-O(8)  | 158.96(8) |
| Cu(2)-N(2)   | 1.928(2)   | N(2)-Cu(2)-O(1)  | 90.76(8)  |
| Cu(2)-N(3)   | 1.980(2)   | N(2)-Cu(2)-O(3)  | 86.84(8)  |
| Cu(2)-O(3)   | 1.9341(17) | O(3)-Cu(2)-N(3)  | 102.02(8) |
| Cu(2)-O(4)   | 2.337(2)   | N(3)-Cu(2)-O(1)  | 79.06(8)  |
| Cu(1)-Cu(2)  | 3.019      | O(1)-Cu(2)-O(3)  | 173.03(7) |
|              |            | N(2)-Cu(2)-N(3)  | 165.33(9) |
|              |            | Cu(1)-O(1)-Cu(2) | 100.80(8) |
|              |            | Cu(1)-N(3)-Cu(2) | 100.07(9) |

**Table S4.** Bond distances [Å] and angles [°] for **4**.

| Bond lengths | Å        | Bond angles     | [°]        |
|--------------|----------|-----------------|------------|
| Cu(1)-O(1)   | 1.943(4) | N(1)-Cu(1)-O(1) | 92.60(18)  |
| Cu(1)-N(1)   | 1.928(5) | N(1)-Cu(1)-O(4) | 86.10(19)  |
| Cu(1)-N(3)   | 1.992(4) | O(4)-Cu(1)-N(3) | 100.80(18) |
| Cu(1)-O(4)   | 1.916(4) | N(3)-Cu(1)-O(1) | 80.47(18)  |

|             |          |                  |            |
|-------------|----------|------------------|------------|
| Cu(1)-O(6)  | 2.505(6) | N(1)-Cu(1)-N(3)  | 171.3(2)   |
| Cu(2)-O(1)  | 1.941(4) | O(1)-Cu(1)-O(4)  | 178.67(18) |
| Cu(2)-N(2)  | 1.920(4) | N(2)-Cu(2)-O(1)  | 92.28(18)  |
| Cu(2)-N(3)  | 1.971(5) | N(2)-Cu(2)-O(3)  | 85.10(18)  |
| Cu(2)-O(3)  | 1.929(4) | O(3)-Cu(2)-N(3)  | 101.84(18) |
| Cu(2)-O(5)  | 2.797(4) | N(3)-Cu(2)-O(1)  | 81.02(17)  |
| Cu(4)-F(4)  | 2.728(3) | O(1)-Cu(2)-O(3)  | 173.05(19) |
| Cu(1)-Cu(2) | 2.985    | N(2)-Cu(2)-N(3)  | 172.86(19) |
|             |          | Cu(1)-O(1)-Cu(2) | 100.44(17) |
|             |          | Cu(1)-N(3)-Cu(2) | 97.8(2)    |

**Table S5.** Bond distances [Å] and angles [°] for **5**.

| Bond lengths | Å          | Bond angles       | [°]        |
|--------------|------------|-------------------|------------|
| Cu(4)-Cu(5)  | 2.8650(13) | O(4)-Cu(4)-O(15)  | 89.1(2)    |
| Cu(4)-O(4)   | 1.940(5)   | O(4)-Cu(4)-O(11)  | 85.9(2)    |
| Cu(4)-O(5)   | 2.162(5)   | O(5)-Cu(4)-Cu(5)  | 160.28(17) |
| Cu(4)-O(13)  | 1.920(5)   | O(13)-Cu(4)-O(4)  | 176.2(2)   |
| Cu(4)-O(15)  | 1.967(5)   | O(13)-Cu(4)-O(15) | 91.9(2)    |
| Cu(4)-O(11)  | 2.004(5)   | O(13)-Cu(4)-O(11) | 94.8(2)    |
| Cu(5)-O(20)  | 1.948(5)   | O(15)-Cu(4)-O(11) | 154.6(2)   |
| Cu(5)-O(12)  | 1.984(5)   | O(20)-Cu(5)-O(12) | 88.1(2)    |
| Cu(5)-O(16)  | 1.983(6)   | O(20)-Cu(5)-O(16) | 87.8(2)    |
| Cu(5)-O(14)  | 1.920(5)   | O(16)-Cu(5)-O(12) | 156.8(2)   |
| Cu(5)-O(21)  | 2.163(5)   | O(14)-Cu(5)-O(20) | 177.4(2)   |
| Cu(7)-Cu(6)  | 2.9428(15) | O(14)-Cu(5)-O(12) | 91.3(2)    |
| Cu(7)-O(22)  | 1.933(5)   | O(14)-Cu(5)-O(16) | 93.7(2)    |
| Cu(7)-O(17)  | 1.934(5)   | O(21)-Cu(5)-Cu(4) | 163.60(16) |
| Cu(7)-O(18)  | 1.975(6)   | O(22)-Cu(7)-O(17) | 81.2(2)    |
| Cu(7)-O(10)  | 2.174(6)   | O(22)-Cu(7)-O(18) | 99.7(2)    |
| Cu(7)-N(4)   | 1.935(7)   | O(22)-Cu(7)-N(4)  | 166.3(2)   |
| Cu(6)-O(20)  | 1.939(5)   | O(17)-Cu(7)-O(18) | 164.2(2)   |
| Cu(6)-O(22)  | 1.966(5)   | O(17)-Cu(7)-N(4)  | 91.1(2)    |
| Cu(6)-O(17)  | 1.916(5)   | N(4)-Cu(7)-O(18)  | 84.6(3)    |
| Cu(6)-N(3)   | 1.914(6)   | O(20)-Cu(6)-O(22) | 101.9(2)   |
| Cu(6)-O(23)  | 2.509(6)   | O(17)-Cu(6)-O(20) | 174.2(2)   |
| Cu(6)-O(16)  | 2.483(5)   | O(17)-Cu(6)-O(22) | 80.8(2)    |
| Cu(2)-Cu(1)  | 2.9389(15) | N(3)-Cu(6)-O(20)  | 85.0(2)    |
| Cu(2)-O(4)   | 1.930(5)   | N(3)-Cu(6)-O(22)  | 170.6(3)   |
| Cu(2)-O(6)   | 1.983(5)   | N(3)-Cu(6)-O(17)  | 92.9(2)    |
| Cu(2)-O(1)   | 1.920(5)   | O(4)-Cu(2)-O(6)   | 100.7(2)   |
| Cu(2)-O(11)  | 2.363(6)   | O(1)-Cu(2)-O(4)   | 177.1(2)   |
| Cu(2)-N(2)   | 1.901(6)   | O(1)-Cu(2)-O(6)   | 81.3(2)    |
| Cu(3)-O(22)  | 2.258(5)   | N(2)-Cu(2)-O(4)   | 86.2(2)    |

|             |          |                   |          |
|-------------|----------|-------------------|----------|
| Cu(3)-O(6)  | 2.012(5) | N(2)-Cu(2)-O6     | 167.1(2) |
| Cu(3)-O(7)  | 1.995(6) | N(2)-Cu(2)-O(1)   | 92.3(3)  |
| Cu(3)-O(23) | 1.964(6) | O(7)-Cu(2)-O(11)  | 156.4(6) |
| Cu(3)-O(9)  | 1.919(6) | O(7)-Cu(3)-O(6)   | 86.9(2)  |
| Cu(3)-O(8)  | 2.592(6) | O(23)-Cu(3)-O(6)  | 92.5(2)  |
| Cu(1)-O(6)  | 1.945(5) | O(23)-Cu(3)-O(7)  | 172.5(2) |
| Cu(1)-O(1)  | 1.926(5) | O(9)-Cu(3)-O(6)   | 167.4(2) |
| Cu(1)-O(8)  | 2.382(7) | O(9)-Cu(3)-O(7)   | 88.7(2)  |
| Cu(1)-N(1)  | 1.915(7) | O(9)-Cu(3)-O(23)  | 90.3(3)  |
| Cu(1)-O(2)  | 1.928(7) | O(8)-Cu(3)-O(22)  | 154.8(4) |
|             |          | O(1)-Cu(1)-O(6)   | 82.1(2)  |
|             |          | O(1)-Cu(1)-O(2)   | 168.9(4) |
|             |          | N(1)-Cu(1)-O(6)   | 174.8(3) |
|             |          | N(1)-Cu(1)-O(1)   | 92.9(3)  |
|             |          | N(1)-Cu(1)-O(2)   | 86.1(3)  |
|             |          | O(2)-Cu(1)-O(6)   | 98.6(3)  |
|             |          | Cu(7)-O(22)-Cu(6) | 98.0(2)  |
|             |          | Cu(7)-O(22)-Cu(3) | 117.3(2) |
|             |          | Cu(6)-O(22)-Cu(3) | 102.1(2) |
|             |          | Cu(6)-O(17)-Cu(7) | 99.7(2)  |
|             |          | C(68)-O(17)-Cu(7) | 130.6(5) |
|             |          | C(68)-O(17)-Cu(6) | 129.5(5) |
|             |          | Cu(2)-O(6)-Cu(3)  | 109.3(3) |
|             |          | Cu(1)-O(6)-Cu(2)  | 96.9(2)  |
|             |          | Cu(1)-O(6)-Cu(3)  | 109.6(2) |
|             |          | Cu(2)-O(1)-Cu(1)  | 99.7(2)  |
|             |          | C(5)-O(1)-Cu(2)   | 130.8(6) |
|             |          | C(5)-O(1)-Cu(1)   | 128.8(5) |

**Table S6.** Bond distances [Å] and angles [°] for **6**.

| Bond lengths              | Å         | Bond angles      | [°]      |
|---------------------------|-----------|------------------|----------|
| Cu(2)-Cu(3 <sup>1</sup> ) | 3.004(4)  | O(4)-Cu(2)-O(1)  | 171.6(4) |
| Cu(2)-O(8)                | 2.373(10) | O(6)-Cu(2)-O(1)  | 83.7(4)  |
| Cu(2)-O(1)                | 1.938(10) | O(6)-Cu(2)-O(4)  | 95.8(4)  |
| Cu(2)-O(4)                | 1.923(10) | N(2)-Cu(2)-O(1)  | 91.6(5)  |
| Cu(2)-O(6)                | 1.920(10) | N(2)-Cu(2)-O(4)  | 87.2(5)  |
| Cu(2)-N(2)                | 1.888(13) | N(2)-Cu(2)-O(6)  | 167.8(4) |
| Cu(2)-O(9)                | 2.59(2)   | Cu(8)-Cu(2)-O(9) | 165.2(3) |
| Cu(1)-O(1)                | 1.952(10) | O(1)-Cu(1)-O(6)  | 81.7(4)  |
| Cu(1)-O(2)                | 1.874(10) | O(2)-Cu(1)-O(1)  | 174.5(4) |
| Cu(1)-O(6)                | 1.982(9)  | O(2)-Cu(1)-O(6)  | 100.3(4) |
| Cu(1)-N(1)                | 1.912(12) | O(2)-Cu(1)-N(1)  | 87.8(5)  |
| Cu(1)-O(10)               | 2.55(6)   | N(1)-Cu(1)-O(1)  | 90.4(5)  |

|                          |           |                                |           |
|--------------------------|-----------|--------------------------------|-----------|
| Cu(3)-O(2)               | 1.931(9)  | N(1)-Cu(1)-O(6)                | 171.6(5)  |
| Cu(3)-O(6 <sup>1</sup> ) | 1.947(9)  | O(2)-Cu(3)-O(6 <sup>1</sup> )  | 93.3(4)   |
| Cu(3)-O(12)              | 1.897(9)  | O(2)-Cu(3)-O(9)                | 162.7(4)  |
| Cu(3)-O(9)               | 1.948(10) | O(6 <sup>1</sup> )-Cu(3)-O(9)  | 86.9(4)   |
| Cu(5)-O(7)               | 2.243(12) | O(12)-Cu(3)-O(2)               | 92.1(4)   |
| Cu(5)-O(16)              | 1.954(10) | O(12)-Cu(3)-O(6 <sup>1</sup> ) | 165.8(4)  |
| Cu(5)-O(11)              | 1.952(9)  | O(12)-Cu(3)-O(9)               | 91.8(4)   |
| Cu(5)-O(12)              | 1.936(9)  | O(11)-Cu(5)-O(16)              | 81.5(4)   |
| Cu(5)-N(4)               | 1.932(12) | O(12)-Cu(5)-O(16)              | 101.2(4)  |
| Cu(4)-O(8)               | 2.403(10) | O(12)-Cu(5)-O(11)              | 171.6(4)  |
| Cu(4)-O(16)              | 1.953(9)  | N(4)-Cu(5)-O(16)               | 167.7(4)  |
| Cu(4)-O(11)              | 1.956(11) | N(4)-Cu(5)-O(11)               | 90.7(5)   |
| Cu(4)-O(14)              | 1.944(10) | N(4)-Cu(5)-O(12)               | 85.3(5)   |
| Cu(4)-N(3)               | 1.934(11) | O(16)-Cu(4)-O(11)              | 81.4(4)   |
|                          |           | O(14)-Cu(4)-O(16)              | 102.6(4)  |
|                          |           | O(14)-Cu(4)-O(11)              | 174.5(4)  |
|                          |           | N(3)-Cu(4)-O(16)               | 167.7(4)  |
|                          |           | N(3)-Cu(4)-O(11)               | 89.6(5)   |
|                          |           | N(3)-Cu(4)-O(14)               | 85.9(5)   |
|                          |           | Cu(2)-O(8)-Cu(4)               | 106.6(4)  |
|                          |           | C(16)-O(8)-Cu(2)               | 113.8(9)  |
|                          |           | C(16)-O(8)-Cu(4)               | 116.4(9)  |
|                          |           | Cu(2)-O(1)-Cu(1)               | 97.5(4)   |
|                          |           | C(5)-O(1)-Cu(2)                | 129.7(10) |
|                          |           | C(5)-O(1)-Cu(1)                | 131.9(10) |
|                          |           | Cu(1)-O(2)-Cu(3)               | 123.5(5)  |
|                          |           | C(10)-O(2)-Cu(1)               | 108.9(8)  |
|                          |           | C(10)-O(2)-Cu(3)               | 113.6(9)  |
|                          |           | Cu(2)-O(6)-Cu(1)               | 97.1(4)   |
|                          |           | Cu(2)-O(6)-Cu(3 <sup>1</sup> ) | 102.0(5)  |
|                          |           | Cu(3 <sup>1</sup> )-O(6)-Cu(1) | 118.9(4)  |
|                          |           | Cu(4)-O(16)-Cu(5)              | 97.4(4)   |
|                          |           | Cu(5)-O(11)-Cu(4)              | 97.3(4)   |
|                          |           | C(34)-O(11)-Cu(5)              | 128.0(9)  |
|                          |           | C(34)-O(11)-Cu(4)              | 128.0(10) |
|                          |           | Cu(3)-O(12)-Cu(5)              | 117.6(5)  |
|                          |           | C(39)-O(12)-Cu(3)              | 122.8(8)  |
|                          |           | C(39)-O(12)-Cu(5)              | 106.5(7)  |

## IR and UV-Vis Spectroscopy

In the IR spectrum (experimental section) of **1** which has EO intradimer and interdimer ( $\mu$ -1,1-N<sub>3</sub>) bridging azide groups, and **3**, **4**, and **7** which have only intradimer  $\mu$ -1,1-N<sub>3</sub> ion, one, two, or three strong bands are observed at (cm<sup>-1</sup>) 2093, 2037(**1**), 2110, 2074, 2050 (**3**), 2114, 2080 (**4**) and 2035 cm<sup>-1</sup> (**7**), typical for such bridging moieties.<sup>40,48,49</sup> The IR spectra of **1-6** show one to three bands in the regions 3137-3423 cm<sup>-1</sup> and two bands in the region 1608-1645 cm<sup>-1</sup> due to  $\nu$ (OH) (H<sub>2</sub>O and CH<sub>3</sub>OH) or  $\nu$ (NH<sub>2</sub>) and  $\nu$ (C=N)/ $\nu$ (C=O) of coordinated imine/carbonyl of benzoate groups respectively.

The UV-Vis spectra of **1-6** compounds, recorded in DMF solution, are characterized by a very strong band in the region 320-378 nm and a low energy shoulder in the region 370-420 nm, which are assigned to metal-azide/metal-ligand charge transfer transitions. The d-d transition, characteristic for Cu(II) is observed as a broad band in the region 620-665 nm, typical for square

pyramidal/octahedrally-based geometry.<sup>67</sup> A typical UV-Vis spectrum of complex **5** is shown in Fig. S1

Fig S1. UV-Vis spectrum of **5** in DMF

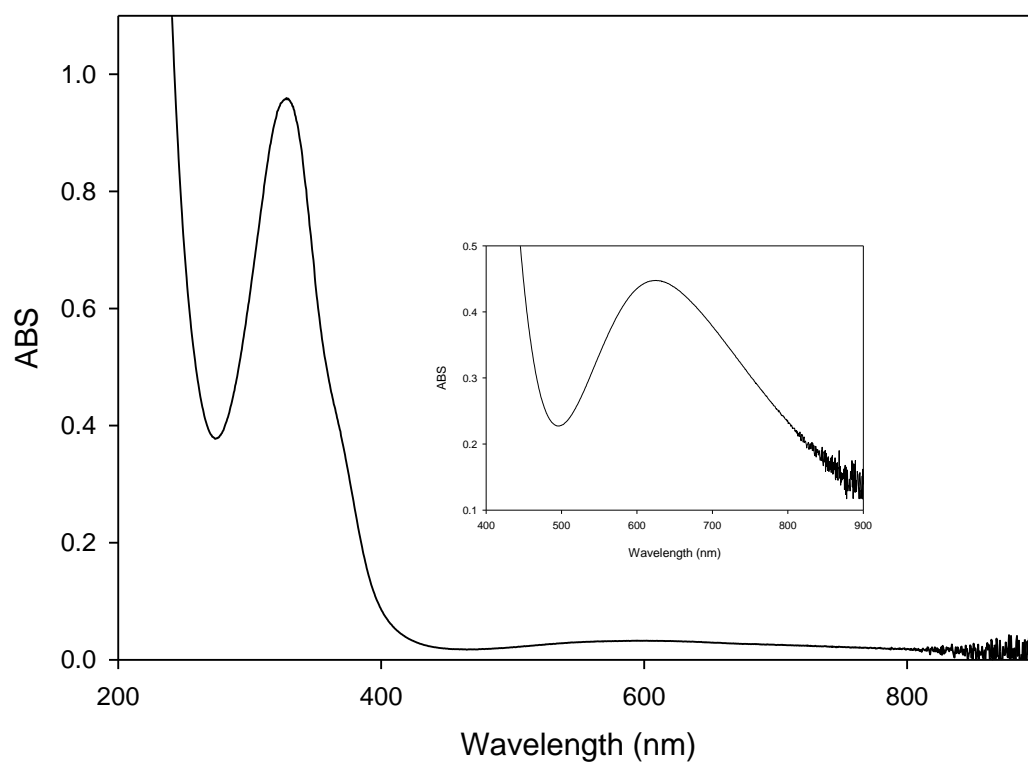

Supplement: s1 [file s1]
